# Supplementary material for: Can prognostic factors for indirect muscle injuries in elite football (soccer) players be identified using data from preseason screening? An exploratory analysis using routinely-collected periodic health examination records
Source: medRxiv preprint, doi:10.1101/2021.01.15.21249653, version 1 (2021-01-15)
Supplement: SUPPLEMENTARY FILE 2 [file 249653_file04.docx]

Does preseason screening provide a source of potential prognostic factors for indirect muscle injuries in elite football (soccer) players? An exploratory analysis using routinely-collected periodic health examination data

Hughes, T., Riley, R.D., Callaghan, M.J. and Sergeant, J.C. (2021)

**Supplementary file 2: Candidate prognostic factors that were excluded**

| Type of prognostic factor | Candidate Prognostic Factor | Composite variable created | Measurement unit | Measurement method | Data type | Reason for elimination |
| --- | --- | --- | --- | --- | --- | --- |
| Anthropometric | Body fat | No | Percentage | Skin calipers | Continuous | Missing data > 15% |
| Musculoskeletal test | Quadriceps muscle length difference* | Yes | Degrees | Ely’s test using digital inclinometer | Continuous | Intra-rater ICC = 0.691  Inter-rater ICC = 0.66. 1 |
| Mean quadriceps muscle length** | Yes | Degrees | Ely’s test using goniometer | Continuous | Intra-rater ICC = 0.691  Inter-rater ICC = 0.66. 1 |
| Toe touch in standing | No | Centimetres | Fingertips to floor distance | Continuous | Missing data > 15% |
| Sacroiliac joint kinematic function | No | Subjective score | Gillets test | Categorical | Missing data > 15% |
| Functional movement/balance tests | Y Balance Test – anterior translation difference* | Yes | Centimetres | Y Balance Test | Continuous | Missing data >15% |
| Y Balance Test – Mean anterior translation** | Yes | Centimetres | Y Balance Test | Continuous | Missing data >15% |
| Y Balance Test – posteromedial translation difference* | Yes | Centimetres | Y Balance Test | Continuous | Missing data >15% |
| Y Balance Test – Mean posteromedial translation** | Yes | Centimetres | Y Balance Test | Continuous | Missing data >15% |
| Y Balance Test –posterolateral translation difference* | Yes | Centimetres | Y Balance Test | Continuous | Missing data >15% |
| Y Balance Test – Mean posterolateral translation** | Yes | Centimetres | Y Balance Test | Continuous | Missing data >15% |
| R relative tibial angles | No | Degrees | SLS measurement with Dorsavi Viperform IMU | Continuous | Within-session ICCs=0.27-0.75  Between-session ICCs = 0.55-0.772 |
| L relative tibial angles (left leg) | No | Degrees | SLS measurement with Dorsavi Viperform IMU | Continuous | Within-session ICCs= 0.27-0.75  Between-session ICCs = 0.55-0.772 |
| Strength/power tests | Upper body peak power difference* | Yes | Normalised watts per kilo (W/kg-0.67) | Double horizontal press using a Keiser Chest Press Air 350 machine | Continuous | Missing data > 15% |
| Mean upper body peak power** | Yes | Normalised watts per kilo (W/kg-0.67) | Double horizontal press using a Keiser Chest Press Air 350 machine | Continuous | Missing data > 15% |

*Key: PHE=periodic health examination; WBL=weight bearing lunge; CMJ=countermovement jump; PROM=passive range of movement; ICC=intraclass correlation coefficient; SLR= straight leg raise; SLS = single leg squat; BMI= body mass index; f=force; W= watts; (note that W/kg-0.67 has a scaling factor to normalise power to body mass) Kg=kilos; IMU= inertial measurement units; m = mass; Note: composite factors are identified in the table with * denoting between limb differences and **denoting combined mean values of both limbs.*

**References:**

1. Peeler J, Anderson JE. Reliability of the Ely's test for assessing rectus femoris muscle flexibility and joint range of motion. *J Orth Res* 2008;26(6):793-9.

2. Hughes T, Jones RK, Starbuck C, et al. Are tibial angles measured with inertial sensors useful surrogates for frontal plane projection angles measured using 2-dimensional video analysis during single leg squat tasks? A reliability and agreement study in elite football (soccer) players. *J Electromyogr Kinesiol* 2019;44:21-30. doi: 10.1016/j.jelekin.2018.11.005
