# Supplementary material for: Can prognostic factors for indirect muscle injuries in elite football (soccer) players be identified using data from preseason screening? An exploratory analysis using routinely-collected periodic health examination records
Source: medRxiv preprint, doi:10.1101/2021.01.15.21249653, version 1 (2021-01-15)
Supplement: SUPPLEMENTARY FILE 4 [file 249653_file06.docx]

Does preseason screening provide a source of potential prognostic factors for indirect muscle injuries in elite football (soccer) players? An exploratory analysis using routinely-collected periodic health examination data

Hughes, T., Riley, R.D., Callaghan, M.J. and Sergeant, J.C. (2021)

**Supplementary file 4: Graph to show the distribution of observed and imputed values for continuous variables**


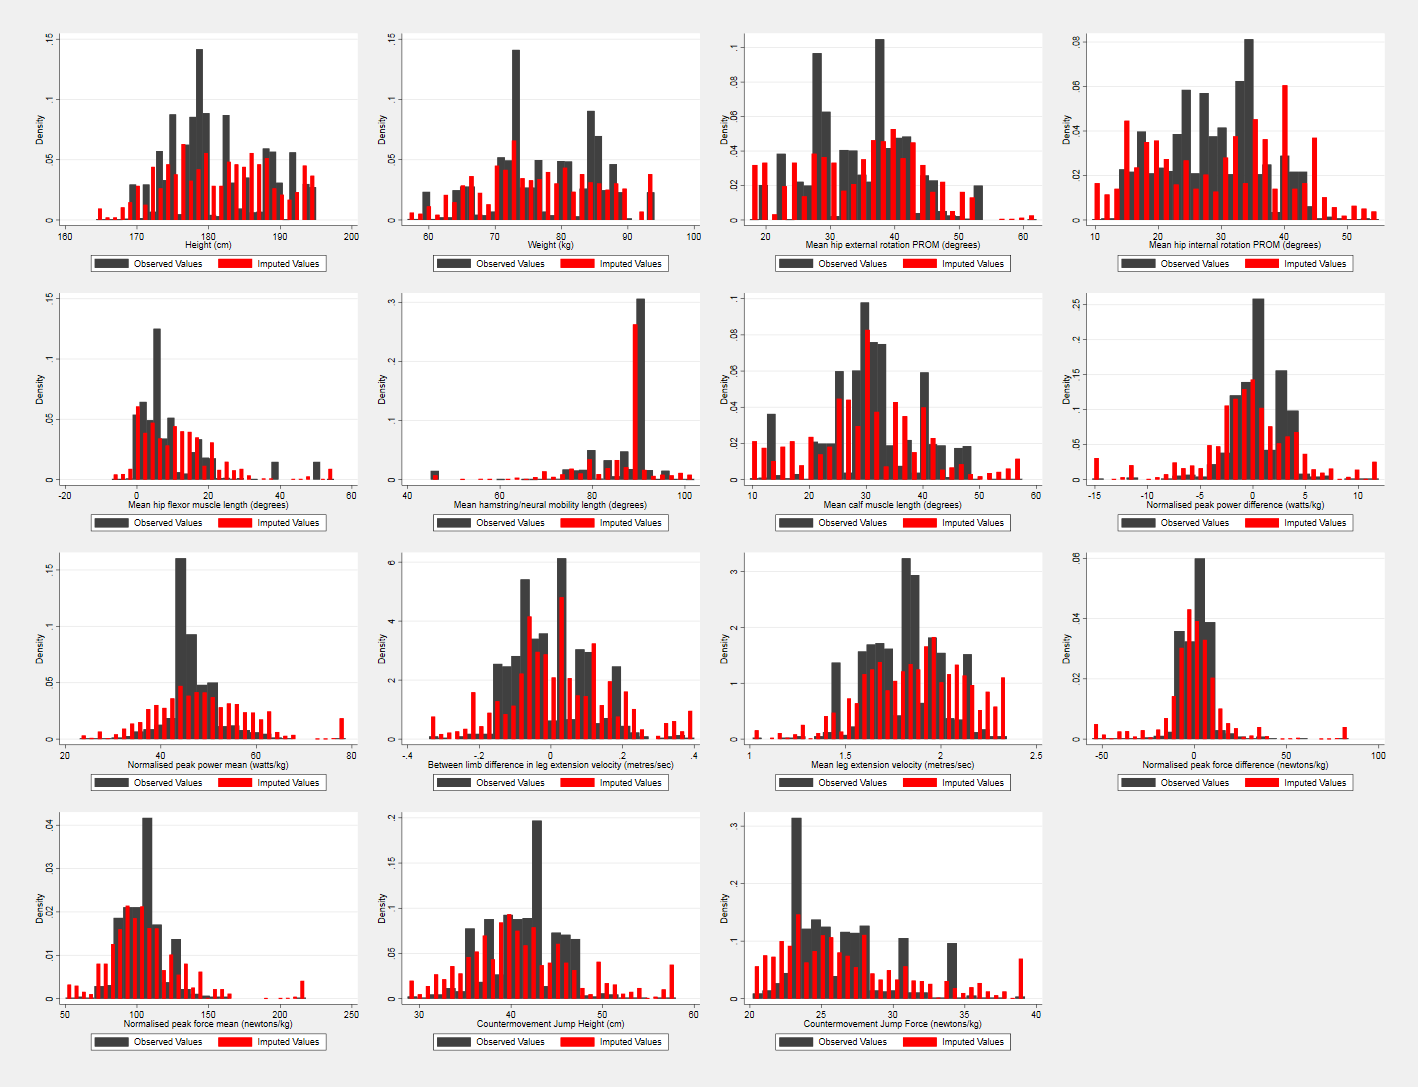


Key: cm = centimetres;

kg = kilograms;

PROM = passive range of movement
